# Supplementary material
Source: publisher figshare collection journal article supplement (https://sage.figshare.com/ndownloader/files/21327762)
Supplement: Supplementary file 1 [file 21327762]

**Supplementary Table 1. Data on number of contributing authors for each journal, for each country, ranked for number of contributing authors.**

| **BMC Palliative Care** | | | **Palliative Medicine** | | | **Journal of Palliative Medicine** | | | **BMJ Supportive and Palliative Care** | | | **Journal of Pain And Symptom Management** | | |
| --- | --- | --- | --- | --- | --- | --- | --- | --- | --- | --- | --- | --- | --- | --- |
| **Rank** | **Country** | **N** | **Rank** | **Country** | **N** | **Rank** | **Country** | **N** | **Rank** | **Country** | **N** | **Rank** | **Country** | **N** |
| 1 | England | 71 | 1 | England | 124 | 1 | USA | 644 | 1 | England | 130 | 1 | USA | 1300 |
| 2 | Australia | 34 | 2 | USA | 54 | 2 | Canada | 36 | 2 | USA | 26 | 2 | Canada | 208 |
| 3 | Canada | 32 | 3 | Australia | 49 | 2 | Japan | 36 | 3 | Australia | 24 | 3 | England | 86 |
| 3 | Germany | 32 | 4 | Netherlands | 42 | 4 | Australia | 33 | 4 | Canada | 14 | 4 | Australia | 81 |
| 5 | USA | 30 | 5 | Canada | 31 | 5 | Germany | 19 | 5 | New Zealand | 12 | 5 | Japan | 50 |
| 6 | Netherlands | 24 | 6 | Germany | 28 | 6 | England | 18 | 5 | Wales | 12 | 6 | Germany | 38 |
| 7 | Belgium | 16 | 7 | Belgium | 21 | 7 | Netherlands | 14 | 7 | Scotland | 9 | 7 | Netherlands | 36 |
| 7 | Spain | 16 | 8 | Scotland | 18 | 8 | Spain | 10 | 8 | Ireland | 8 | 8 | Italy | 30 |
| 7 | Northern Ireland | 16 | 9 | Ireland | 17 | 9 | South Korea | 9 | 8 | Netherlands | 8 | 9 | China Mainland | 26 |
| 10 | Ireland | 11 | 10 | New Zealand | 16 | 10 | China Mainland | 8 | 10 | Italy | 7 | 9 | Ireland | 26 |
| 11 | Sweden | 10 | 11 | Spain | 15 | 10 | Singapore | 8 | 11 | Sweden | 6 | 11 | Spain | 25 |
| 11 | Taiwan | 10 | 12 | Northern Ireland | 12 | 10 | France | 8 | 12 | Belgium | 4 | 12 | France | 23 |
| 13 | France | 9 | 13 | Norway | 11 | 13 | Ireland | 7 | 12 | Singapore | 4 | 13 | Scotland | 19 |
| 13 | Switzerland | 9 | 14 | Italy | 9 | 14 | Portugal | 6 | 12 | Japan | 4 | 14 | Norway | 18 |
| 13 | Norway | 9 | 14 | Switzerland | 9 | 14 | Taiwan | 6 | 12 | India | 4 | 14 | Singapore | 18 |
| 16 | Italy | 8 | 16 | France | 6 | 16 | Malaysia | 5 | 12 | Denmark | 4 | 16 | Belgium | 17 |
| 16 | Japan | 8 | 16 | Sweden | 6 | 17 | Argentina | 4 | 17 | Northern Ireland | 3 | 16 | Taiwan | 17 |
| 18 | New Zealand | 7 | 16 | Portugal | 6 | 17 | Sweden | 4 | 17 | Uganda | 3 | 16 | Switzerland | 17 |
| 19 | South Africa | 6 | 16 | Japan | 6 | 17 | Italy | 4 | 17 | Switzerland | 3 | 19 | India | 16 |
| 20 | China Mainland | 5 | 20 | Singapore | 5 | 17 | Israel | 4 | 17 | Norway | 3 | 19 | Sweden | 16 |
| 20 | Hungary | 5 | 20 | Wales | 5 | 17 | Belgium | 4 | 21 | Germany | 2 | 19 | South Korea | 16 |
| 22 | Denmark | 4 | 22 | South Africa | 4 | 22 | Brazil | 3 | 21 | Spain | 2 | 22 | Brazil | 14 |
| 22 | Uganda | 4 | 22 | Uganda | 4 | 22 | Uganda | 3 | 21 | Philippines | 2 | 23 | Israel | 9 |
| 22 | South Korea | 4 | 24 | China Mainland | 3 | 22 | Northern Ireland | 3 | 21 | Malaysia | 2 | 23 | New Zealand | 9 |
| 25 | Brazil | 3 | 24 | Taiwan | 3 | 25 | Denmark | 2 | 21 | Kenya | 2 | 25 | Denmark | 8 |
| 25 | Wales | 3 | 24 | South Korea | 3 | 25 | Thailand | 2 | 26 | Brazil | 1 | 25 | Poland | 8 |
| 25 | Scotland | 3 | 24 | Hungary | 3 | 25 | New Zealand | 2 | 26 | China Mainland | 1 | 27 | Iran | 7 |
| 25 | Portugal | 3 | 24 | Denmark | 3 | 25 | Mexico | 2 | 26 | Cameroon | 1 | 28 | Argentina | 6 |
| 25 | India | 3 | 29 | Brazil | 2 | 25 | Kenya | 2 | 26 | Egypt | 1 | 28 | Northern Ireland | 6 |
| 30 | Finland | 2 | 29 | Sri Lanka | 2 | 30 | Costa Rica | 1 | 26 | France | 1 | 28 | Bangladesh | 6 |
| 30 | Poland | 2 | 29 | Poland | 2 | 30 | Cyprus | 1 | 26 | Hungary | 1 | 31 | Jordan | 5 |
| 30 | Kenya | 2 | 29 | Pakistan | 2 | 30 | Dominican Republic | 1 | 26 | Israel | 1 | 31 | Wales | 5 |
| 33 | Austria | 1 | 29 | Israel | 2 | 30 | Egypt | 1 | 26 | Kuwait | 1 | 31 | Uganda | 5 |
| 33 | Czech Republic | 1 | 34 | Austria | 1 | 30 | India | 1 | 26 | Mexico | 1 | 31 | South Africa | 5 |
| 33 | Ethiopia | 1 | 34 | Bahrain | 1 | 30 | Iran | 1 | 26 | Nigeria | 1 | 35 | Colombia | 4 |
| 33 | Indonesia | 1 | 34 | Czech Republic | 1 | 30 | Iraq | 1 | 26 | Portugal | 1 | 35 | Saudi Arabia | 4 |
| 33 | Lithuania | 1 | 34 | Gambia | 1 | 30 | Jordan | 1 | 26 | South Korea | 1 | 35 | Nepal | 4 |
| 33 | Malaysia | 1 | 34 | India | 1 | 30 | Lebanon | 1 | 26 | Taiwan | 1 | 38 | Greece | 3 |
| 33 | Republic Of Georgia | 1 | 34 | Jordan | 1 | 30 | Pakistan | 1 | 26 | Thailand | 1 | 38 | Portugal | 3 |
| 33 | Saudi Arabia | 1 | 34 | Lithuania | 1 | 30 | Panama | 1 | 26 | Vietnam | 1 | 38 | Nigeria | 3 |
| 33 | Singapore | 1 | 34 | Luxembourg | 1 | 30 | Poland | 1 |  |  |  | 38 | Iraq | 3 |
| 33 | Trinidad & Tobago | 1 | 34 | Malta | 1 | 30 | Saudi Arabia | 1 |  |  |  | 42 | Afghanistan | 2 |
| 33 | Thailand | 1 | 34 | Serbia | 1 | 30 | Switzerland | 1 |  |  |  | 42 | Kenya | 2 |
| 33 | Turkey | 1 |  |  |  | 30 | Turkey | 1 |  |  |  | 42 | Indonesia | 2 |
| 33 | United Arab Emirates | 1 |  |  |  | 30 | United Arab Emirates | 1 |  |  |  | 42 | Ghana | 2 |
|  |  |  |  |  |  | 30 | United Kingdom | 1 |  |  |  | 42 | Finland | 2 |
|  |  |  |  |  |  | 30 | Yemen | 1 |  |  |  | 42 | Egypt | 2 |
|  |  |  |  |  |  |  |  |  |  |  |  | 42 | Ecuador | 2 |
|  |  |  |  |  |  |  |  |  |  |  |  | 42 | Chile | 2 |
|  |  |  |  |  |  |  |  |  |  |  |  | 42 | Cameroon | 2 |
|  | Total | 414 |  | Total | 533 |  | Total | 925 |  | Total | 313 |  | Total | 2218 |

| **Variable** | | **N (%)** | **Model 1*** | | **Model 2*** | |
| --- | --- | --- | --- | --- | --- | --- |
|  | |  | **Odds Ratio (95% CI)** | **p value** | **Odds Ratio (95% CI)** | **p value** |
| **Region of journal publication** | |  |  |  |  |  |
|  | *European* | 1,260 (28.6%) | Reference | p<0.01 | **14.0** (10.9, 17.9) | p<0.01 |
| *North American* | 3,142 (71.4%) | **16.4** (12.9, 20.8) | Reference |
| **Publication model** | |  |  |  |  |  |
|  | *Open access publication models* | 414 (9.4%) | **1.0** (0.7, 1.4) | p=0.88 | **2.2** (1.8, 2.9) | p<0.01 |
| *Mixed publication models* | 3,988 (90.6%) | Reference | Reference |
| **Number of papers published in 2015 and 2016** | |  |  |  |  |  |
|  | *<300 papers* | 2,184 (49.6%) | **1.3** (1.1, 1.6) | p<0.01 | **0.6** (0.5, 0.8) | p<0.01 |
| *≥300 papers* | 2,218 (50.4%) | Reference | Reference |
| **Model 1 (Dependent variable):** | | | | | | |
|  | *Author is from North America* | 2,382 (54.1%) | N/A | | | |
| *Author is not from North America* | 2,020 (45.9%) |
| **Model 2 (Dependent variable):** | | | | | | |
|  | *Author is from Europe* | 1,230 (28.0%) | N/A | | | |
| *Author is not from Europe* | 3,172 (72.0%) |
| *** Model 1:** Odds ratio of author being from North America, adjusting for the region of journal publication, publication model and the number of papers published  **** Model 2:** Odds ratio of author being from Europe, adjusting for the region of journal publication, publication model and the number of papers published | | | | | | |

Supplementary Table 2. Profile for logistic model 1 and 2 (sensitivity test)
